# Supplementary material
Source: PubMed Central journal article supplement (PMC8041350)
Supplement: noaa254_suppl_supplementary_figure_s2.pdf [file noaa254_suppl_supplementary_figure_s2.pdf]

# Supplementary Figure S2

**A**

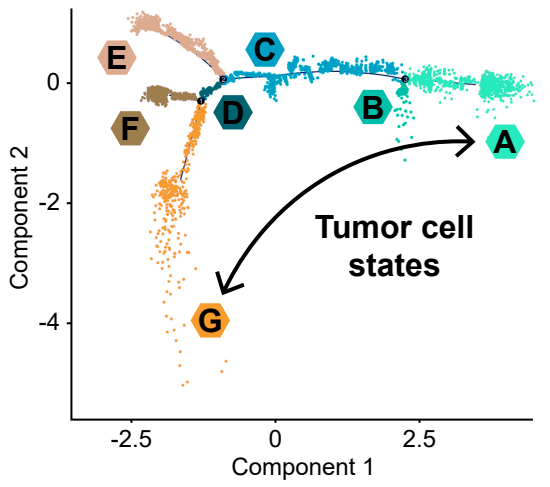

**B**

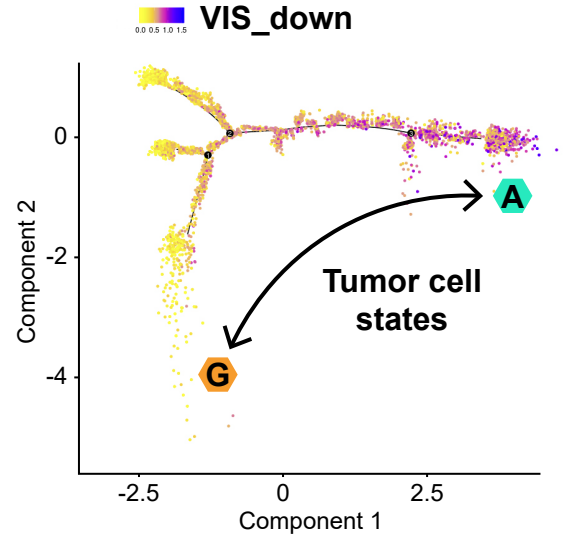

**C**

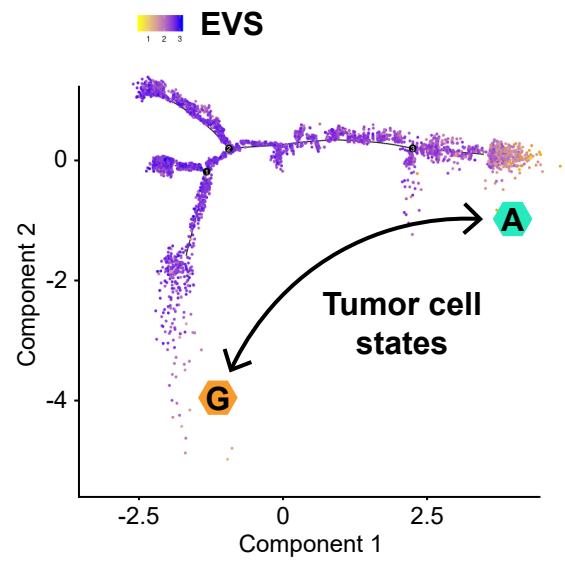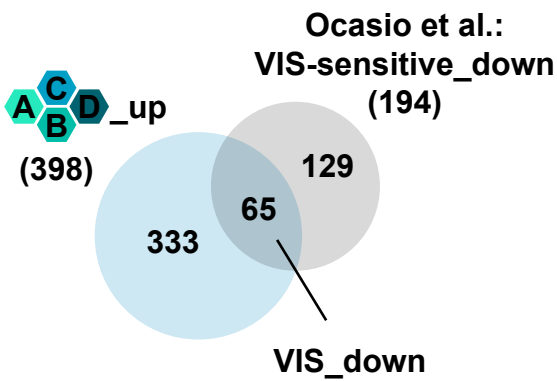

|                |               |                |
|----------------|---------------|----------------|
| <i>Abhd16a</i> | <i>Dner</i>   | <i>Neurod1</i> |
| <i>Ank2</i>    | <i>Elavl2</i> | <i>Npdc1</i>   |
| <i>Ank3</i>    | <i>Elavl3</i> | <i>Nrn1</i>    |
| <i>Ankrd12</i> | <i>Elavl4</i> | <i>Nrxn1</i>   |
| <i>Aplp1</i>   | <i>Frmd4a</i> | <i>Nsg1</i>    |
| <i>App</i>     | <i>Gdpd1</i>  | <i>Pax6</i>    |
| <i>Arl6ip1</i> | <i>Gpm6a</i>  | <i>Pde1c</i>   |
| <i>Atp1b3</i>  | <i>Gria2</i>  | <i>Podxl2</i>  |
| <i>Atp6v0b</i> | <i>Grina</i>  | <i>Ppp3ca</i>  |
| <i>Basp1</i>   | <i>Itm2b</i>  | <i>Rtn1</i>    |
| <i>Brd8</i>    | <i>Kcnk1</i>  | <i>Rtn4</i>    |
| <i>Casc5</i>   | <i>Kif20b</i> | <i>Sept3</i>   |
| <i>Cdk5r1</i>  | <i>Kif5c</i>  | <i>Serinc1</i> |
| <i>Celf2</i>   | <i>Klf7</i>   | <i>Stmn4</i>   |
| <i>Celf4</i>   | <i>Lhx1</i>   | <i>Stxbp1</i>  |
| <i>Chgb</i>    | <i>Malat1</i> | <i>Syt11</i>   |
| <i>Chrna3</i>  | <i>Map1b</i>  | <i>Tnik</i>    |
| <i>Clmp</i>    | <i>Map2</i>   | <i>Top2a</i>   |
| <i>Ctsb</i>    | <i>Miat</i>   | <i>Uncx</i>    |
| <i>Ctsd</i>    | <i>Mki67</i>  | <i>Whsc1</i>   |
| <i>Dbn1</i>    | <i>Ncam1</i>  | <i>Zic1</i>    |
| <i>Dcx</i>     | <i>Ncapd2</i> |                |
