# Supplementary material
Source: PubMed Central journal article supplement (PMC8041350)
Supplement: noaa254_suppl_supplementary_figure_s6.pdf [file noaa254_suppl_supplementary_figure_s6.pdf]

**DEGs UP** vs. MYC-like / EXO

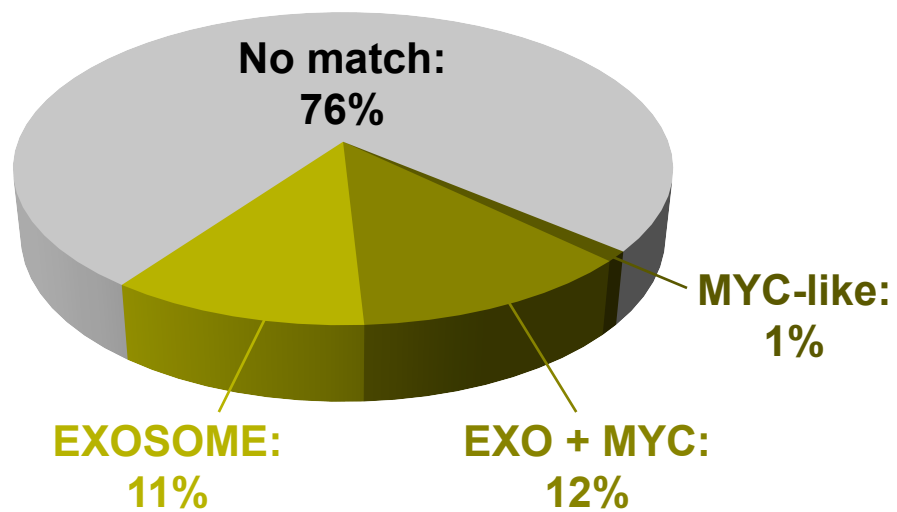

|  | Resource                                               | Count      |
|--|--------------------------------------------------------|------------|
|  | MB exosome (Epple LM <i>et al.</i> , 2012):            | 151        |
|  | Exocarta/Vesiclepedia.                                 | 100        |
|  | GO:0070062_Extracellular exosome:                      | 94         |
|  | Brain tumor exosomes (Graner MW <i>et al.</i> , 2009): | 32         |
|  | <b>EXOSOME:</b>                                        | <b>341</b> |
|  | MB phosphoproteomics (Zomeran WW <i>et al.</i> , 2018) |            |
|  | <b>MYC-like:</b>                                       | <b>68</b>  |
