# Supplementary material
Source: PubMed Central journal article supplement (PMC8041350)

**A**

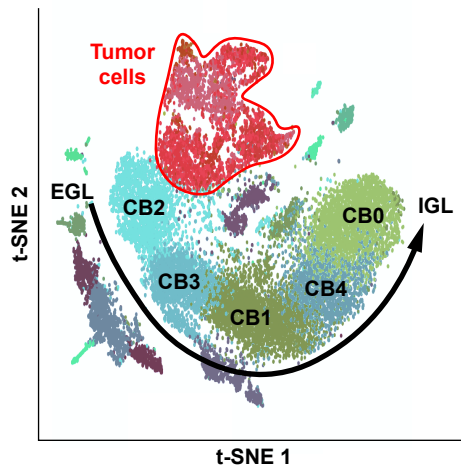

**B**

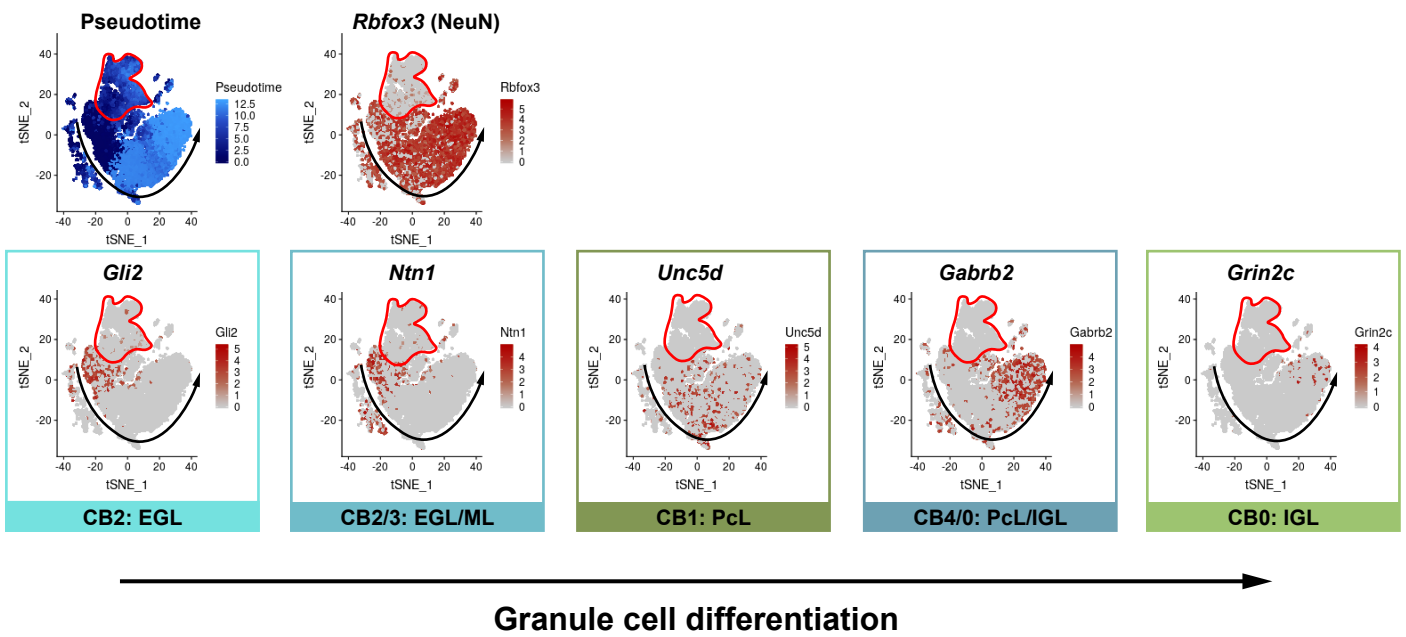

Supplement: noaa254_suppl_supplementary_figure_s1.pdf [file noaa254_suppl_supplementary_figure_s1.pdf]

A

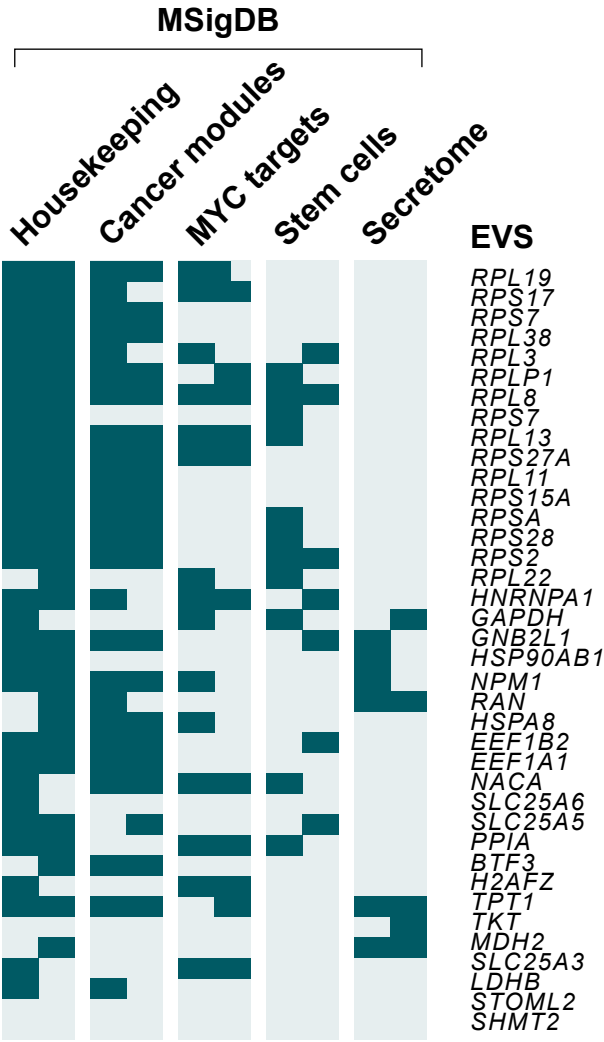

B

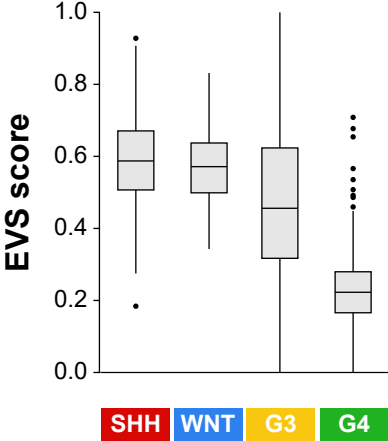

Supplement: noaa254_suppl_supplementary_figure_s10.pdf [file noaa254_suppl_supplementary_figure_s10.pdf]

**A**

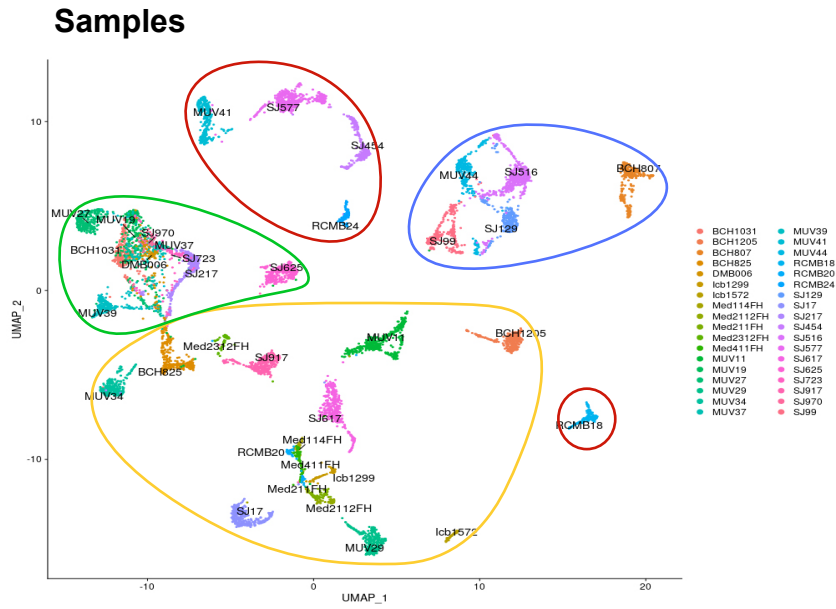

**B**

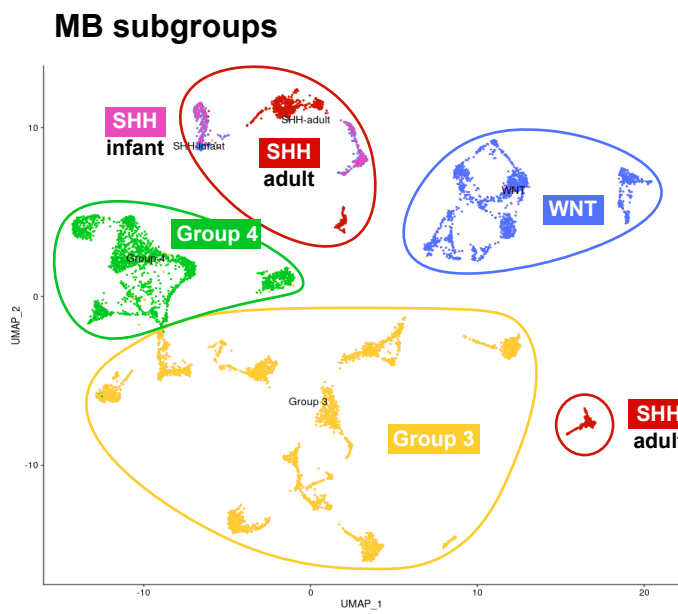

**C**

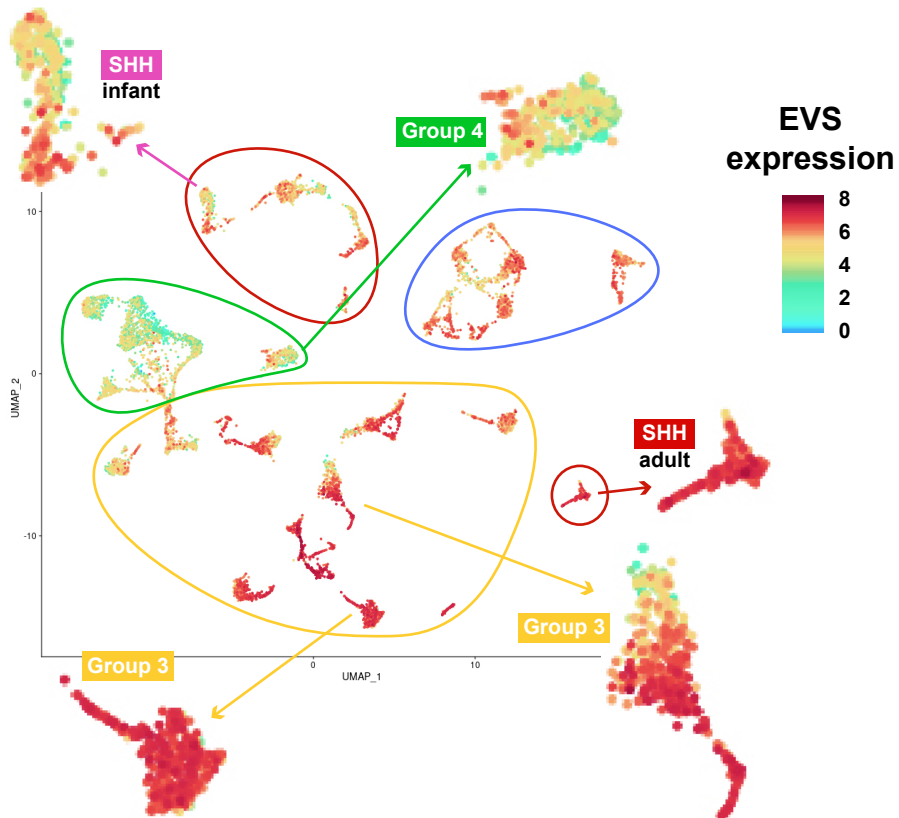

Supplement: noaa254_suppl_supplementary_figure_s11.pdf [file noaa254_suppl_supplementary_figure_s11.pdf]

# Supplementary Figure S12

## A

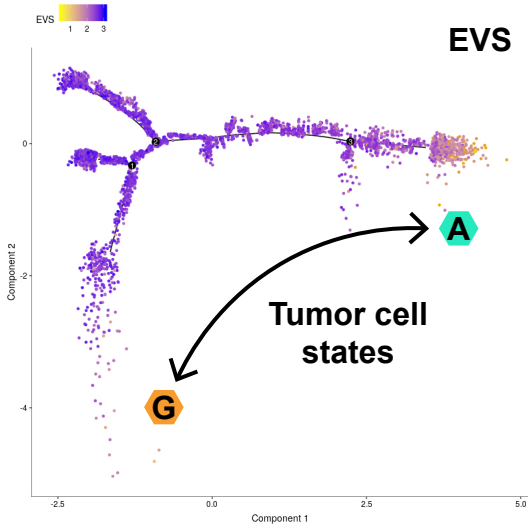

## B

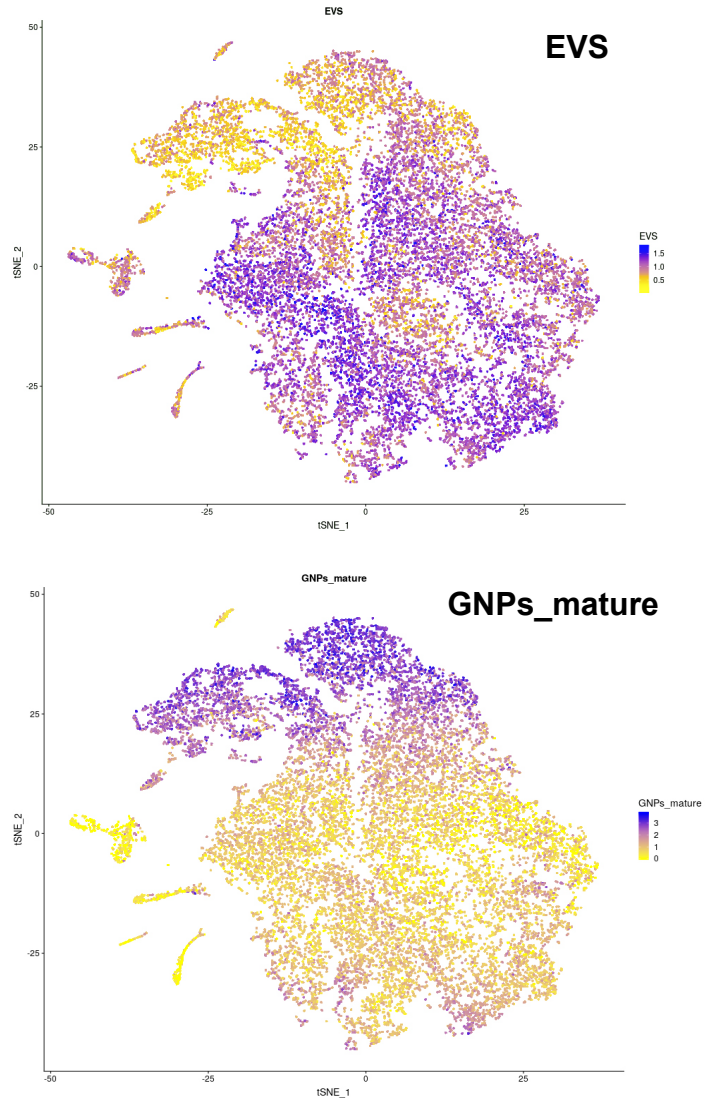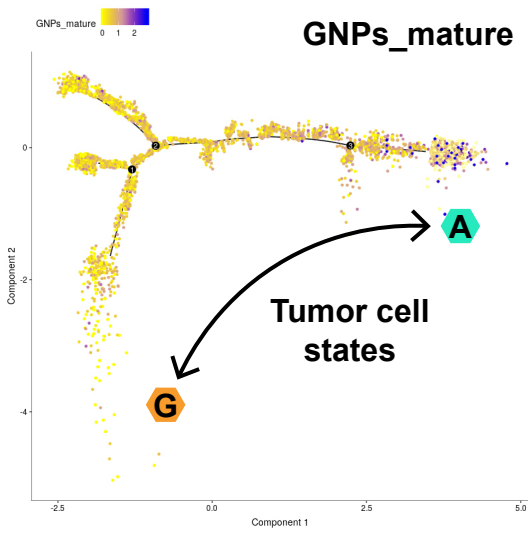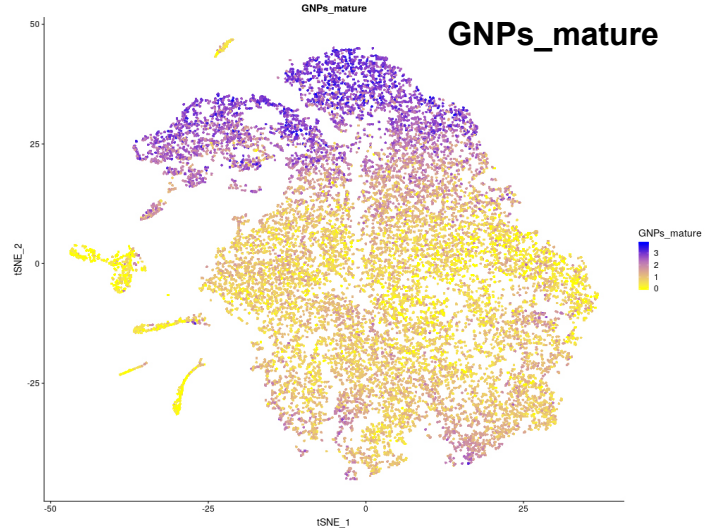

Supplement: noaa254_suppl_supplementary_figure_s12.pdf [file noaa254_suppl_supplementary_figure_s12.pdf]

**A**

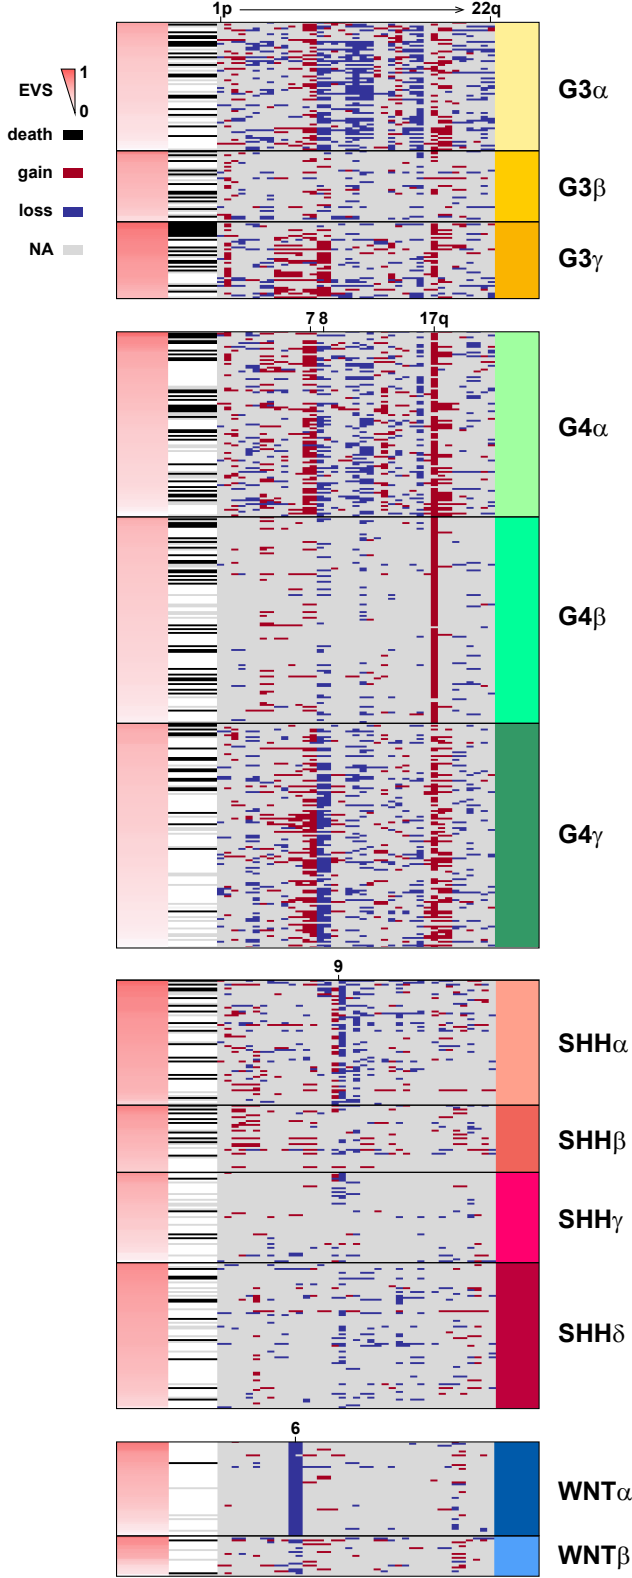

**B**

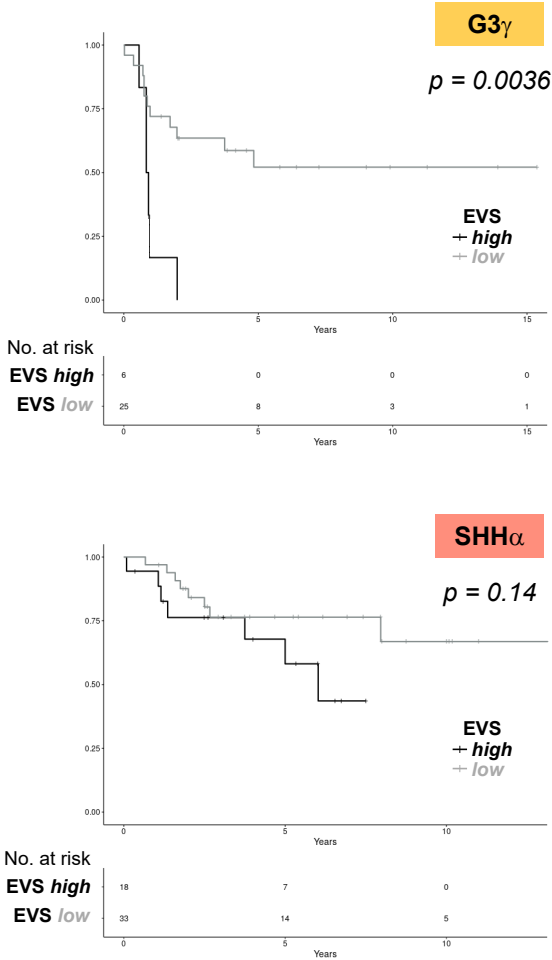

Supplement: noaa254_suppl_supplementary_figure_s13.pdf [file noaa254_suppl_supplementary_figure_s13.pdf]

A

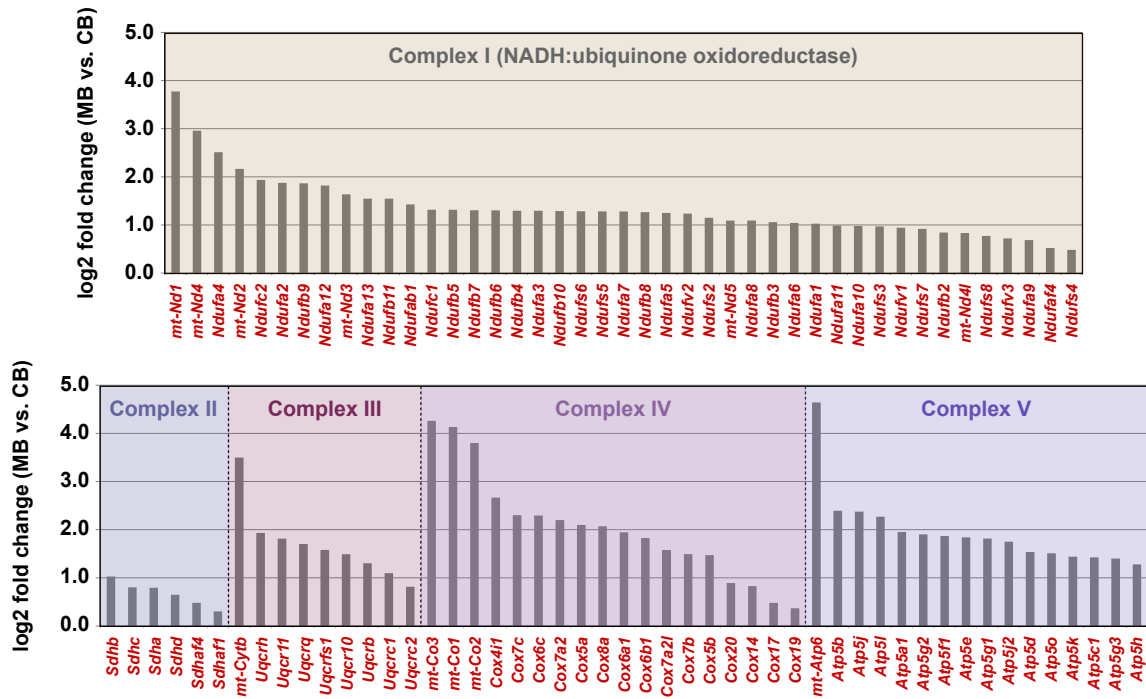

B

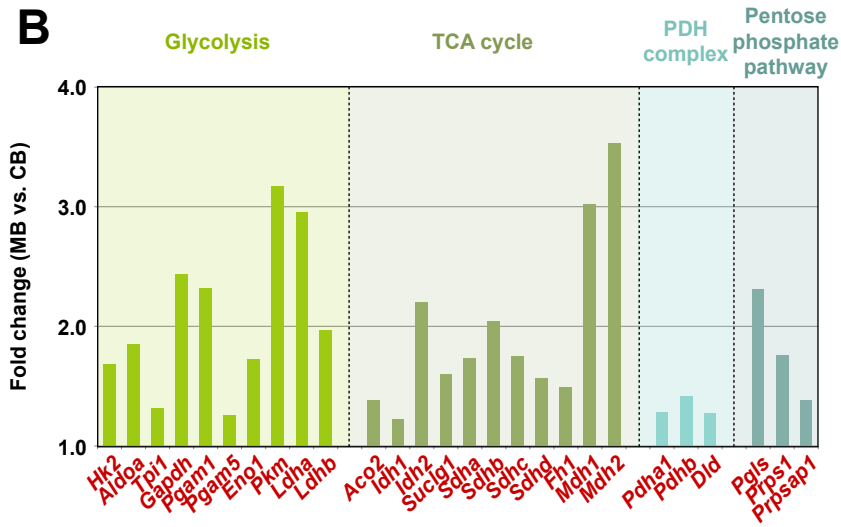

C

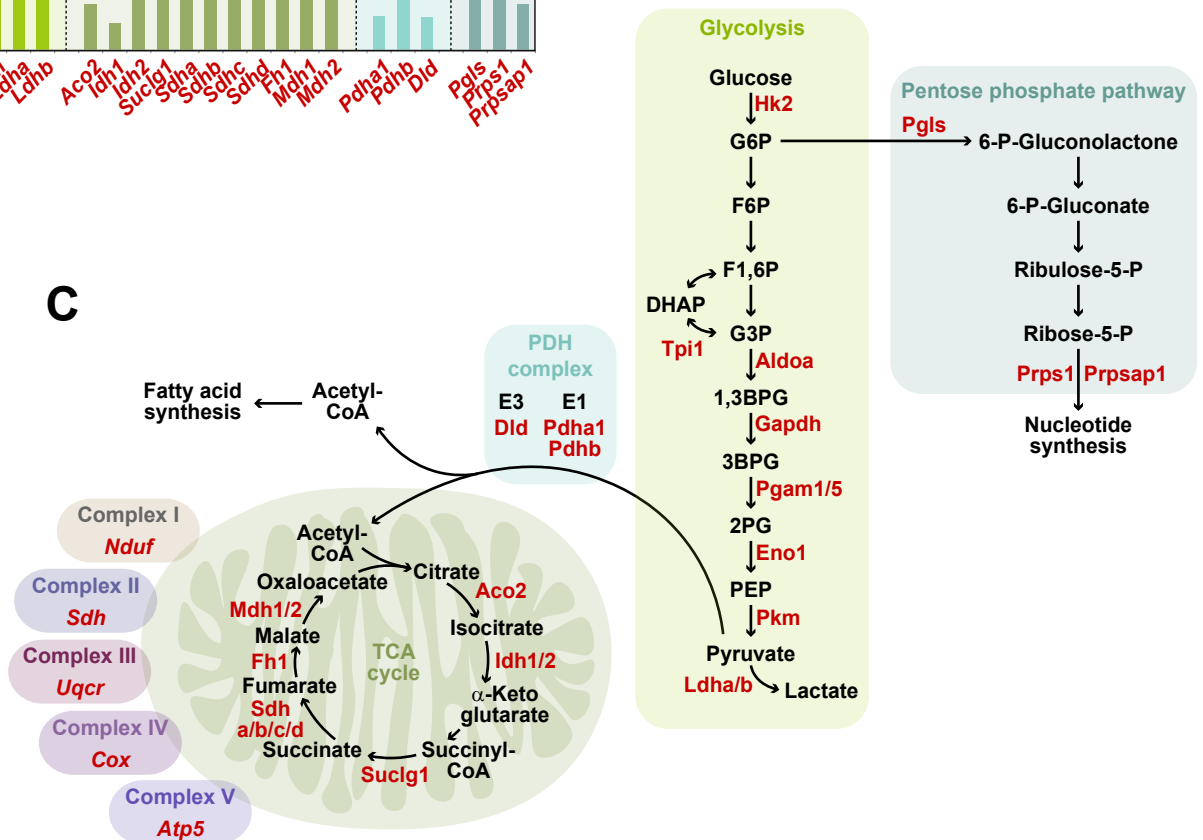

Supplement: noaa254_suppl_supplementary_figure_s3.pdf [file noaa254_suppl_supplementary_figure_s3.pdf]

**A** *Pdgfra*

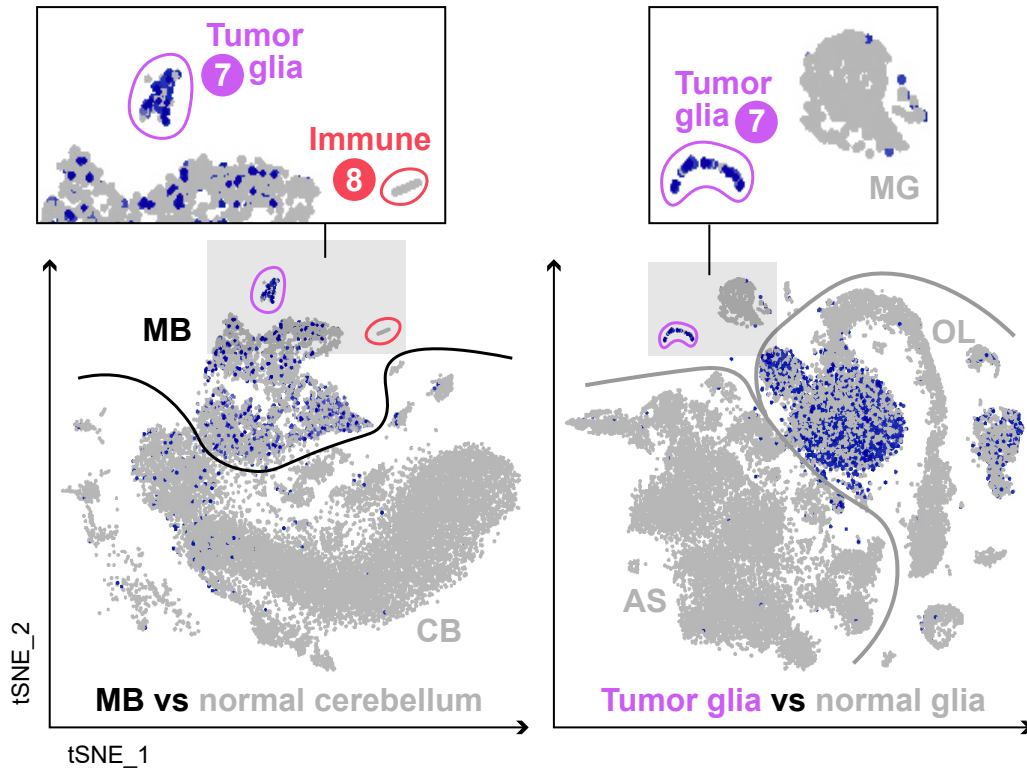

**B** *ApoE*

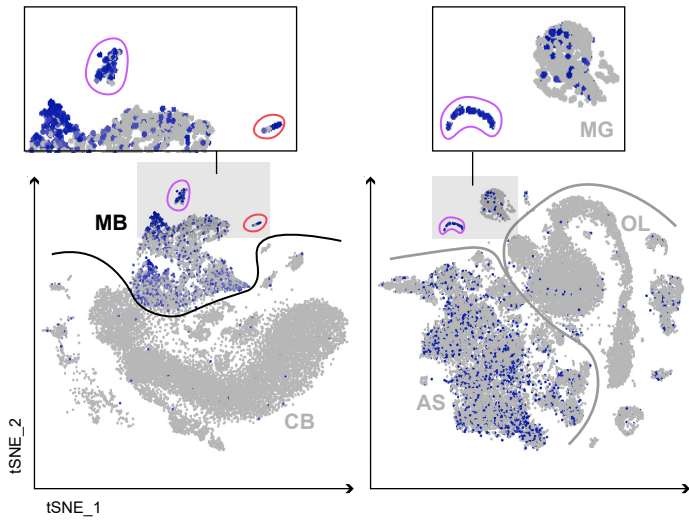

**C** *Lgmn*

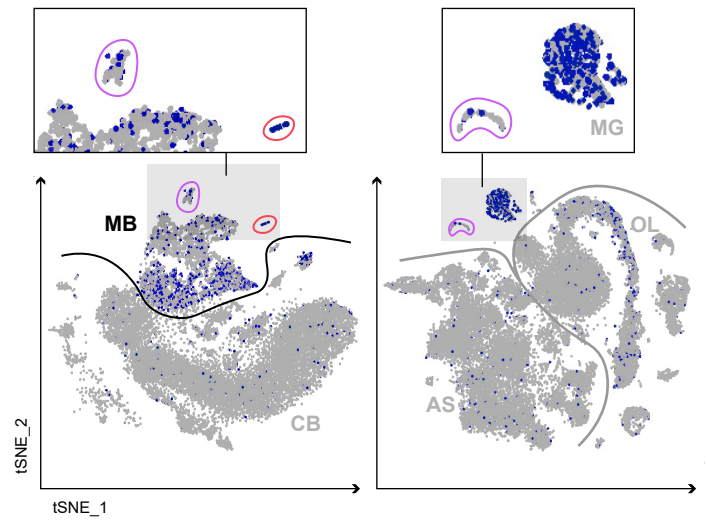

**D** *Cd63*

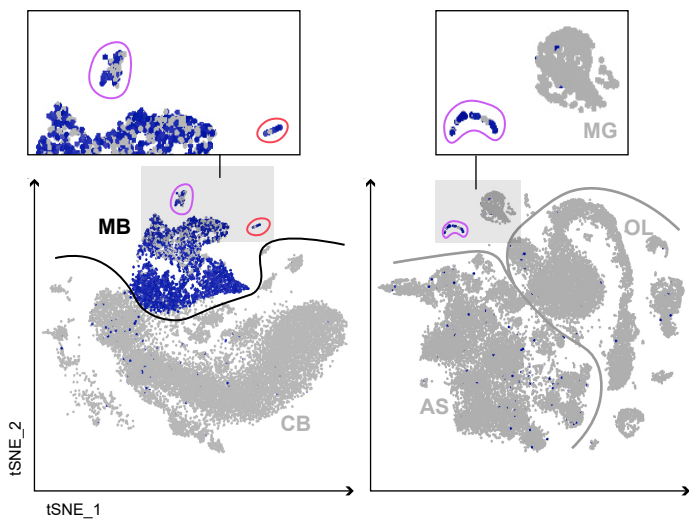

**E** *Ppia*

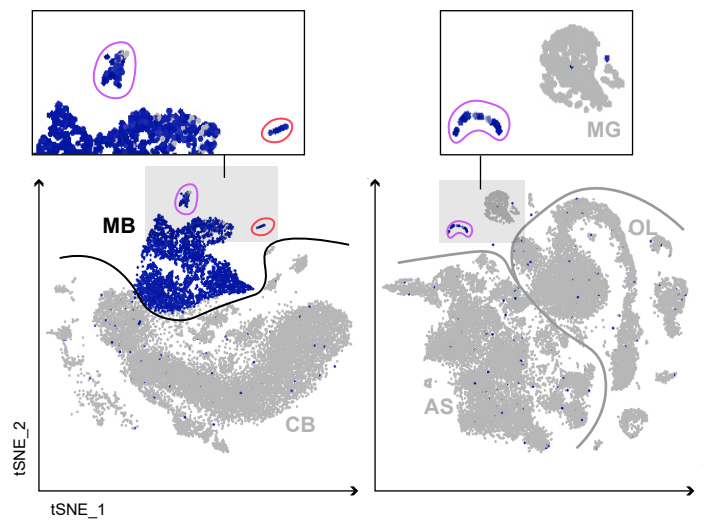

Supplement: noaa254_suppl_supplementary_figure_s4.pdf [file noaa254_suppl_supplementary_figure_s4.pdf]

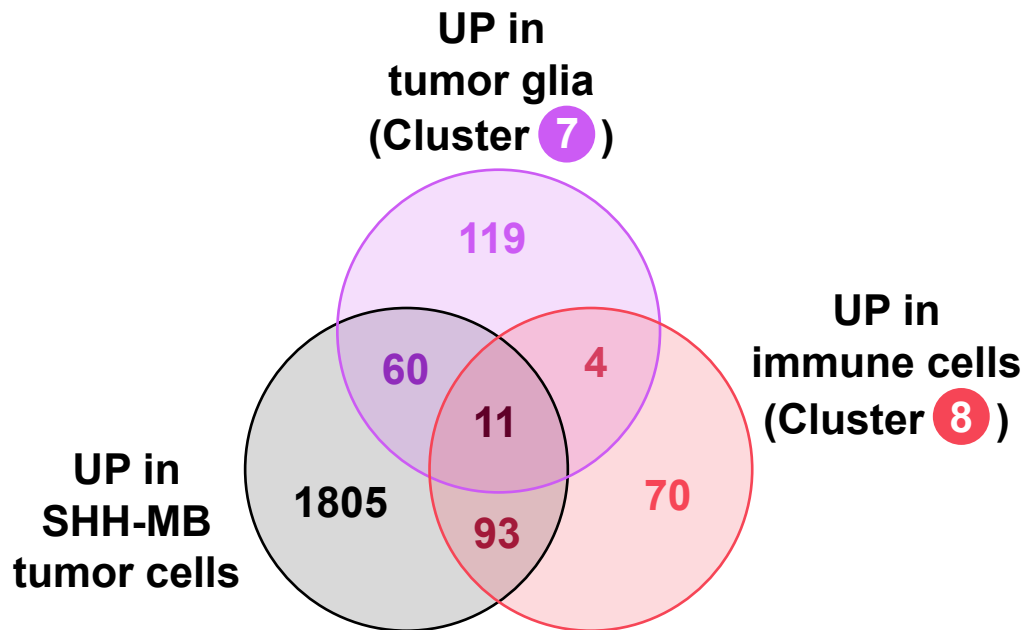

Supplement: noaa254_suppl_supplementary_figure_s5.pdf [file noaa254_suppl_supplementary_figure_s5.pdf]

# Supplementary Figure S7

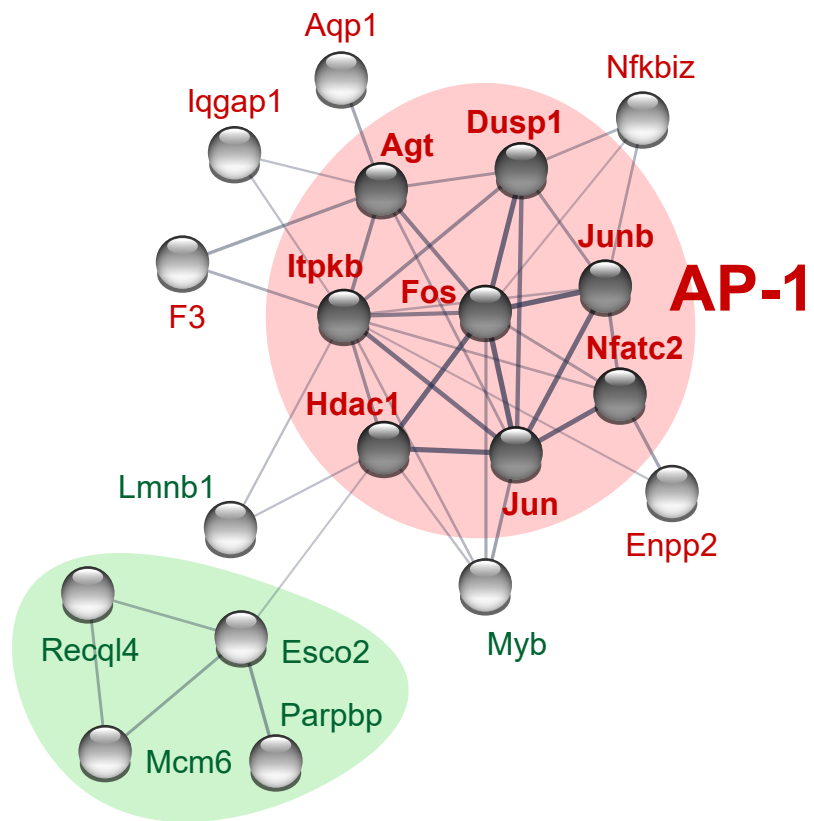

Supplement: noaa254_suppl_supplementary_figure_s7.pdf [file noaa254_suppl_supplementary_figure_s7.pdf]

**A**  
**D341 (Group 3)**

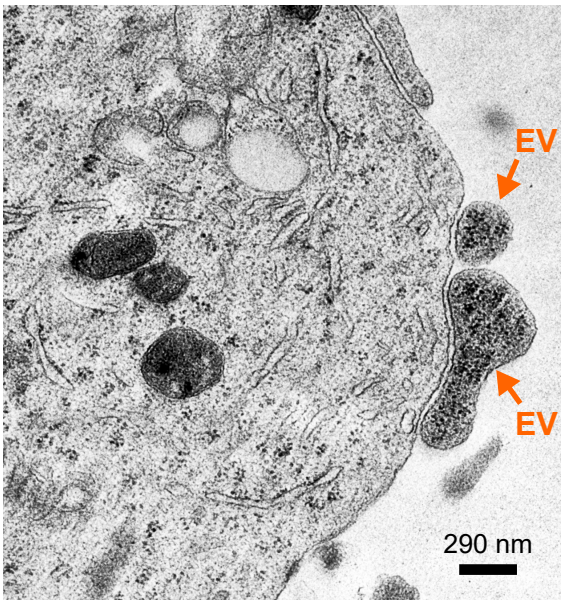

**B**  
**Daoy (SHH)**

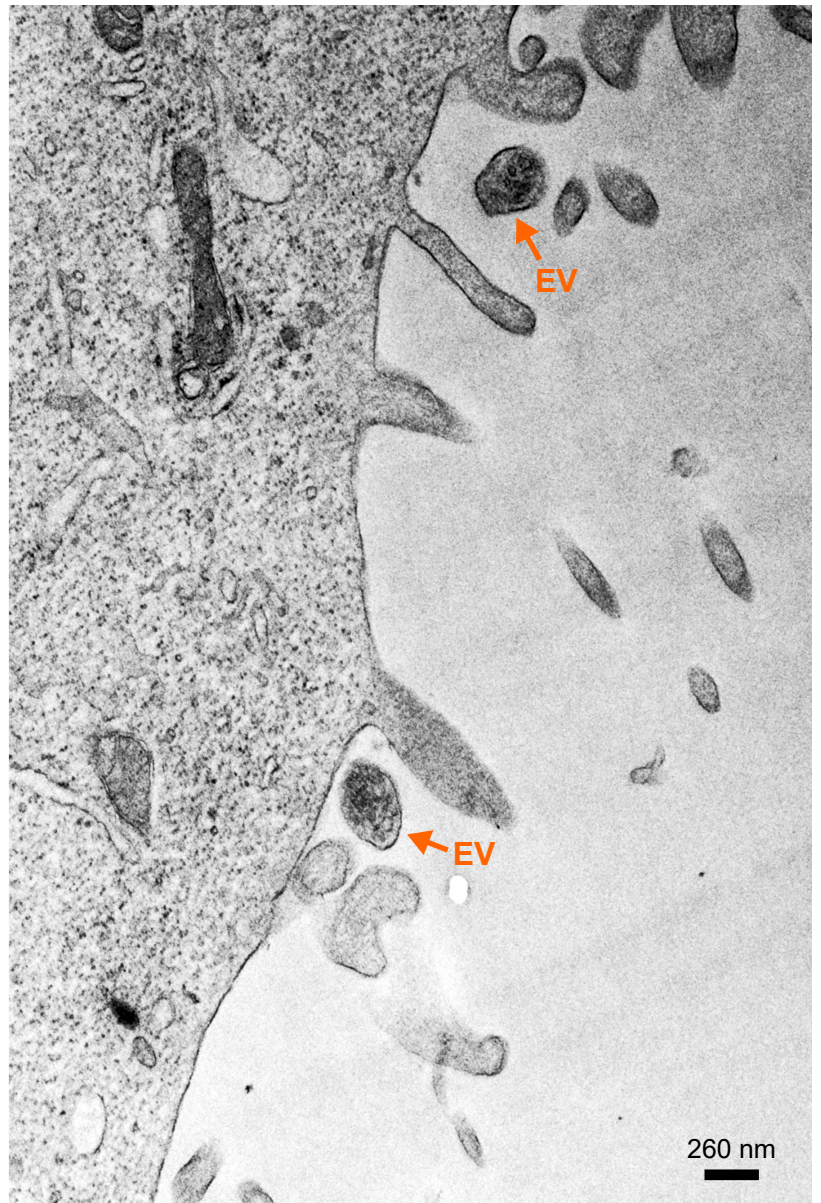

Supplement: noaa254_suppl_supplementary_figure_s9.pdf [file noaa254_suppl_supplementary_figure_s9.pdf]
